# The essential role of *Dnmt1* in gametogenesis in the large milkweed bug

## *Oncopeltus fasciatus*

Joshua T. Washington<sup>1</sup>, Katelyn R. Cavender<sup>1</sup>, Ashley U. Amukamara<sup>1</sup>, Elizabeth C.

McKinney<sup>1</sup>, Robert J. Schmitz<sup>2</sup>, Patricia J. Moore<sup>1</sup>, \*

<sup>1</sup> Department of Entomology, University of Georgia

<sup>2</sup> Department of Genetics, University of Georgia

\*Patricia J. Moore, 413 Biological Sciences Building, Department of Entomology, University of Georgia, Athens, GA, 30602; (706) 542-0169

**Email:** [pjmoore@uga.edu](mailto:pjmoore@uga.edu)

Patricia J. Moore: <https://orcid.org/0000-0001-9802-7217>

Robert J. Schmitz: <https://orcid.org/0000-0001-7538-6663>

### **Keywords**

DNA methylation, epigenetics, *Dnmt1*, spermatogenesis, germ cells, *Oncopeltus fasciatus*

1 **Abstract**

2 Given the importance of DNA methylation in protection of the genome against transposable  
3 elements and transcriptional regulation in other taxonomic groups, the diversity in both levels  
4 and patterns of DNA methylation in the insects raises questions about its function and evolution.  
5 We show that the maintenance DNA methyltransferase, DNMT1, affects meiosis and is essential  
6 to fertility in milkweed bugs, *Oncopeltus fasciatus*, while DNA methylation is not required in  
7 somatic cells. Our results support the hypothesis that *Dnmt1* is required for the transition of germ  
8 cells to gametes in *O. fasciatus* and that this function is conserved in male and female  
9 gametogenesis. They further suggest that DNMT1 has a function independent of DNA  
10 methylation in germ cells. Our results raise the question of how a gene so critical in fitness  
11 across multiple insect species can have diverged widely across the insect tree of life.

12

## 13 **Introduction**

14 Despite the apparent ubiquity of DNA methylation across the eukaryotic tree of life (Schmitz et  
15 al. 2019, Lewis et al. 2020), in the insects there is considerable variation both in the presence and  
16 extent of DNA methylation and even the presence and number of the DNA methyltransferases  
17 (Bewick et al. 2016, Lyko 2018, Glastad et al. 2019). Thus, the functional role of DNA  
18 methylation and its associated DNA methyltransferases in the insects is unclear. While some  
19 studies have associated levels of methylation with gene expression, most studies in the insects  
20 find no functional association (Bewick et al. 2016, Glastad et al. 2019).

21 One role emerging from knockdown and silencing studies across several insect species is that  
22 *Dnmt1* is required for oogenesis (Schulz et al. 2018, Bewick et al. 2019, Gegner et al. 2019,  
23 Amukamara et al. 2020). For example, *Dnmt1* is required for maintenance of DNA methylation  
24 following cell division in the milkweed bug, *Oncopeltus fasciatus* (Bewick et al. 2019,  
25 Amukamara et al. 2020), the downregulation of *Dnmt1* using RNAi results in a reduction in  
26 methylation and also the cessation of oogenesis. However, it is unclear whether the effect on  
27 oogenesis is mediated by the reduction in DNA methylation (Amukamara et al. 2020). While the  
28 expected reduction in DNA methylation is seen throughout the organism following *Dnmt1*  
29 knockdown, the only phenotypic consequence is to the germ cells. Evidence from other species  
30 supports a function independent of DNA methylation. *Dnmt1* is also essential to egg production  
31 in *T. castaneum* (Schulz et al. 2018), a beetle that has no DNA methylation at all (Zemach et al.  
32 2010). This suggests that *Dnmt1* can have a function specific to germ cells in insects that is  
33 independent of its function in maintaining DNA methylation. This led us to hypothesize that  
34 *Dnmt1* plays a role in meiosis in insects (Amukamara et al. 2020).

35 In this study, we tested the hypothesis that *Dnmt1* is essential to gametogenesis in *O. fasciatus*.  
36 Furthermore, if *Dnmt1* has a role in gametogenesis, including meiosis, it should be conserved  
37 across the sexes. Testing the function of *Dnmt1* in males allows us to capitalize on the well-  
38 characterized process of spermatogenesis. In *O. fasciatus*, as in many insects, there are two  
39 points in development where meiosis can occur. The first stage where meiosis will occur is  
40 during the larval stages. Testis development and spermatogenesis is initiated during larval  
41 development in *O. fasciatus* (Economopoulos & Gordon 1971). During the first three instars the  
42 testes consist of seven globular follicles that will develop into the testis tubules (Schmidt et al.  
43 2002). Meiosis is initiated in the 4<sup>th</sup> instar, and by the end of the 4<sup>th</sup> instar, cysts containing  
44 spermatids are present. Differentiation of the spermatids commences in the 5<sup>th</sup> instar, and males  
45 emerge with up to 250,000 spermatids that continue to differentiate during sexual maturation.  
46 Thus, we can target the developmental time point at which meiosis occurs. In addition, *O.*  
47 *fasciatus* males can produce gametes throughout their adult lives and therefore meiosis can occur  
48 in the adult testis. If *Dnmt1* is required for meiosis and gametogenesis we predicted that it will be  
49 required both during larval development and as adult males replenish sperm stores following  
50 mating. We therefore compared the testis phenotypes of adults developing from nymphs in  
51 which *Dnmt1* expression was downregulated either before or after the major wave of meiosis that  
52 occurs in testis development (Economopoulos & Gordon 1971, Schmidt et al. 2002, Ewen-  
53 Campen et al 2013). We also treated sexually mature adults, and examined fertility in males  
54 following sperm depletion, testing for the ability of knockdown males to replenish sperm stores  
55 following multiple matings. Our results demonstrated that *Dnmt1* is required for the development  
56 of sperm both during larval and adult spermatogenesis and that the impact of *Dnmt1* knockdown  
57 was greatest if it occurred prior to the onset of meiotic divisions in the developing testes. These

58 results establish that *Dnmt1* plays a critical conserved function across the sexes during  
59 gametogenesis in *O. fasciatus* and that it is required for germ cell development.

## 60 Results

### 61 The pattern of *Dnmt1* expression during development reflected its role in maintenance of 62 DNA.

63 We measured *Dnmt1* expression during larval development and sexual maturation. Our  
64 prediction was that if *Dnmt1* is required during gametogenesis, particularly meiosis, then its  
65 expression should mirror those of two genes known to be involved in germ cell development,  
66 *Boule* and *Vasa* (Shah et al. 2010, Yajima & Wessel 2011). Thus, we predicted that *Dnmt1*

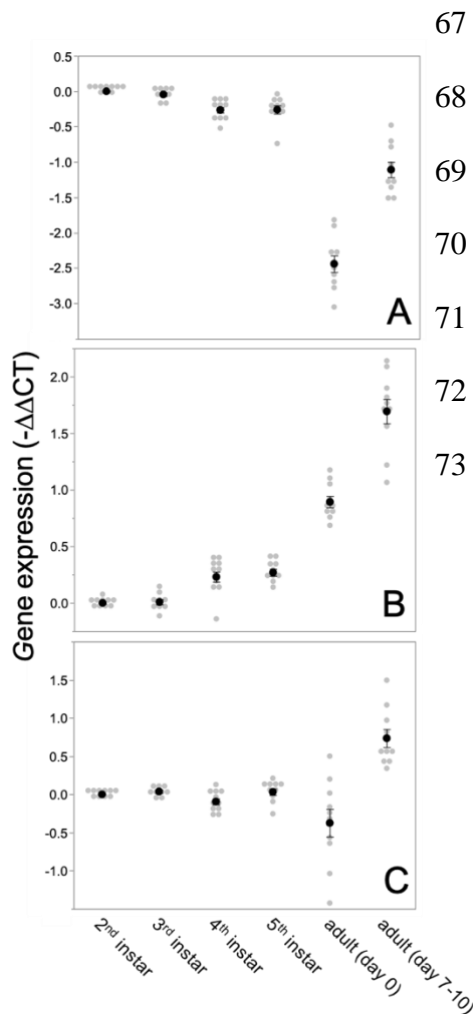

67 expression would be highest during the stages when  
68 gametogenesis is occurring. Contrary to this expectation,  
69 *Dnmt1* expression was highest during larval  
70 development, a time during which cells are dividing, and  
71 expression went down in the adult stages, where there is  
72 relatively less cell division occurring (Figure 1A;  
73 ANOVA,  $F = 170.768$ , d.f. = 5, 54,  $p < 0.001$ ). This

**Figure 1.** Expression levels of *Dnmt1* do not mirror those of genes known to function in germ cell identity and development. (A) Expression levels of *Dnmt1* did not change across nymphal development but did vary during adult sexual maturation. *Dnmt1* expression went down when males emerged as adults, although it recovered with sexual maturity. (B) *Boule* increased across development. Expression was lowest during the 2<sup>nd</sup> and 3<sup>rd</sup> instar stages before meiosis is initiated. *Boule* expression increased in the 4<sup>th</sup> and 5<sup>th</sup> instar stages where meiosis is initiated. Finally, *Boule* expression increased in adult stages and was highest in the testis of sexually mature adults. (C) *Vasa* was expressed across all stages of nymphal development. Expression was low in newly emerged adults but increased significantly during sexual maturation. Black dots and bars represent mean and SE. Grey dots represent data points for each sample tested. Gene expression was standardized per individual.

74 expression pattern differed from what we observed for *Boule*, a gene with a well-characterized  
75 role in meiosis (Figure 1B; ANOVA,  $F = 145.799$ , d.f. = 5, 54,  $p < 0.001$ ). *Dnmt1* expression  
76 pattern also differed from *Vasa*, a highly conserved marker of the germline (Figure 1C; ANOVA,  
77  $F = 16.008$ , d.f. = 5, 54,  $p < 0.001$ ).

78 Given that *Dnmt1* is required during cell division to restore methylation patterns, we predicted  
79 that expression patterns would be similar between the sexes during development. If *Dnmt1* has  
80 an additional function during gametogenesis, however, we would predict that there would be  
81 differences in expression patterns that reflect differences in the pattern of gametogenesis between  
82 males and females. Expression of *Dnmt1* in whole body samples was lower in sexually mature  
83 adult males than sexually mature adult females, but male and female nymphs had the same  
84 expression levels (Supplementary materials, Figure S1). Thus, expression patterns indicated a  
85 similar function during larval development, when cell division is occurring in both sexes, but  
86 also suggested differences between patterns of gametogenesis between males and females as  
87 adults.

### 88 ***Dnmt1* knockdown reduced levels of DNA methylation in the testis genome.**

89 To confirm the effectiveness of our RNAi treatment,  
90 we measured expression of *Dnmt1* in control and ds-  
91 *Dnmt1* injected males (Figure 2). Treatment of males  
92 with ds-*Dnmt1* had the predicted effect on *Dnmt1*  
93 expression. There was an overall statistically  
94 significant reduction in expression in testes of  
95 adult males treated at both the 3<sup>rd</sup> [ $F = 10.597$ ,  
96 d.f. = 1, 10,  $p = 0.009$ ] and 5<sup>th</sup> ( $F = 65.757$ , d.f.

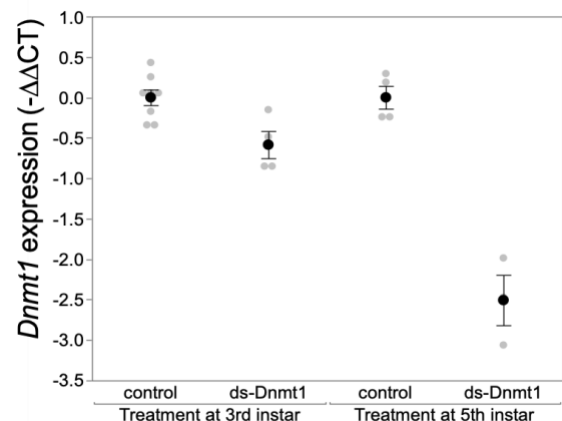

**Figure 2.** Expression of *Dnmt1* was significantly reduced in the testes of adult males treated with ds-*Dnmt1* at both stages of development. Relative gene expression is standardized to expression levels in control treatments. Black dots and bars represent mean and SE. Grey dots represent data points for each individual tested.

97 = 1, 5,  $p < 0.001$ ) instar stage of development. We performed whole genome bisulfite sequencing  
98 to evaluate the impact of the ds-*Dnmt1* on DNA methylation genome wide. The reduction in  
99 expression of *Dnmt1* in the RNAi individuals had the expected phenotypic effect on DNA  
100 methylation with a reduction of genome methylation in the testes for ds-*Dnmt1* treated males, but  
101 not control males (Supplementary materials, Figure S2). Genomic DNA from the testes of  
102 control treated males had approximately 12.5% CpG methylation regardless of stage they were  
103 treated. Knockdown of *Dnmt1* at the earlier stage of development led to a greater percentage  
104 reduction of methylation. Treatment with ds-*Dnmt1* at the 5<sup>th</sup> instar reduced the percent CpG  
105 methylation from around 12.5% to around 5%. Treatment with ds-*Dnmt1* at the 3<sup>rd</sup> instar reduced  
106 the level of methylation even further, to around 2%, as predicted given the greater numbers of  
107 cell divisions that were expected between treatment and sampling between these two treatments.

### 108 *Dnmt1* knockdown affected testis size and structure.

109 Knockdown of *Dnmt1* prior to meiosis, in the 3<sup>rd</sup> instar  
110 stage, had a significant effect on testis size in virgin  
111 males, while knockdown of *Dnmt1* during the  
112 developmental stage at which meiosis occurs, the 5<sup>th</sup>  
113 instar stage, had no effect on testis size (Figure 3). In

114 our overall 2-way ANOVA there were  
115 statistically significant effects of stage of  
116 development at injection ( $F = 142.326$ ,  
117 d.f. = 1,  $p < 0.001$ ), treatment ( $F =$   
118  $18.568$ , d.f. = 1,  $p < 0.001$ ), and a  
119 statistically significant interaction

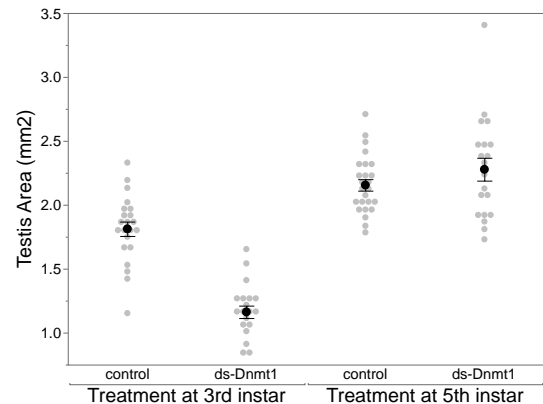

**Figure 3.** Early stage injection and ds-*Dnmt1* both affected testis size in males developing from treated males. The testes of control injected males treated at the 3<sup>rd</sup> instar stage of development are smaller than control males treated at the 5<sup>th</sup> instar stage of development, likely a result of injection injury. Downregulation of *Dnmt1* during the 3<sup>rd</sup> instar stage of development significantly reduced the size of the testis in sexually mature males compared to control males treated at the 3<sup>rd</sup> instar stage of development. There was no effect of downregulation of *Dnmt1* on testis size when treatment occurred at the 5<sup>th</sup> instar stage of development after meiosis has been initiated. Black dots and bars represent mean and SE. Grey dots represent data points for each individual tested.

120 between stage of development at injection and treatment ( $F = 39.947$ , d.f. = 1,  $p < 0.001$ ). Stage  
121 of development at injection had an effect on testis area, even in control injections. Injecting 3<sup>rd</sup>  
122 instar nymphs reduced adult testis area, suggesting an injury effect independent of treatment.  
123 However, ds-*Dnmt1* males had highly statistically significantly smaller testes than control males  
124 at sexual maturation when treated at the 3<sup>rd</sup> instar stage ( $F = 74.155$ , d.f. = 1, 39,  $p < 0.001$ ,  
125 indicating a treatment-specific reduction in testis size in addition to the injection effect in the 3<sup>rd</sup>  
126 instar. Males at the 5<sup>th</sup> instar stage showed no statistically significant difference in testis area at  
127 sexual maturation between treatments ( $F = 1.698$ , d.f. = 1, 43,  $p = 0.199$ ).

128 Knockdown of *Dnmt1* prior to meiosis affected testis tubules to a greater extent than knockdown  
129 following the initiation of meiosis during larval testis development (Figure 4). Control males  
130 injected in the 3<sup>rd</sup> or 5<sup>th</sup> instar stage of development showed the expected structure of the testis  
131 tubule (Figure 4A and C). At the anterior end of the testis tubule, spermatogonia and primary  
132 spermatocytes had the characteristic nuclear structure and there was clear evidence of mitotic  
133 division within the spermatogonia (Figure 4C, arrowhead), using  $\alpha$ -phosphohistone H3 (pHH3)  
134 to stain for chromosome condensation in preparation for mitosis and meiosis. We also observed  
135  $\alpha$ -pHH3 staining in spermatocysts at the border between primary and secondary spermatocytes  
136 in the control testis tubules in both 3<sup>rd</sup> and 5<sup>th</sup> instar treated males. Following this band of  
137 relatively synchronous meiotic activity, the posterior testis tubule showed spermatids and  
138 developing spermatozoa as they matured. We confirmed the use of this band of  $\alpha$ -pHH3 stained  
139 spermatocysts as a landmark of meiosis using knockdown of Boule (Supplementary materials,  
140 Figure S3).



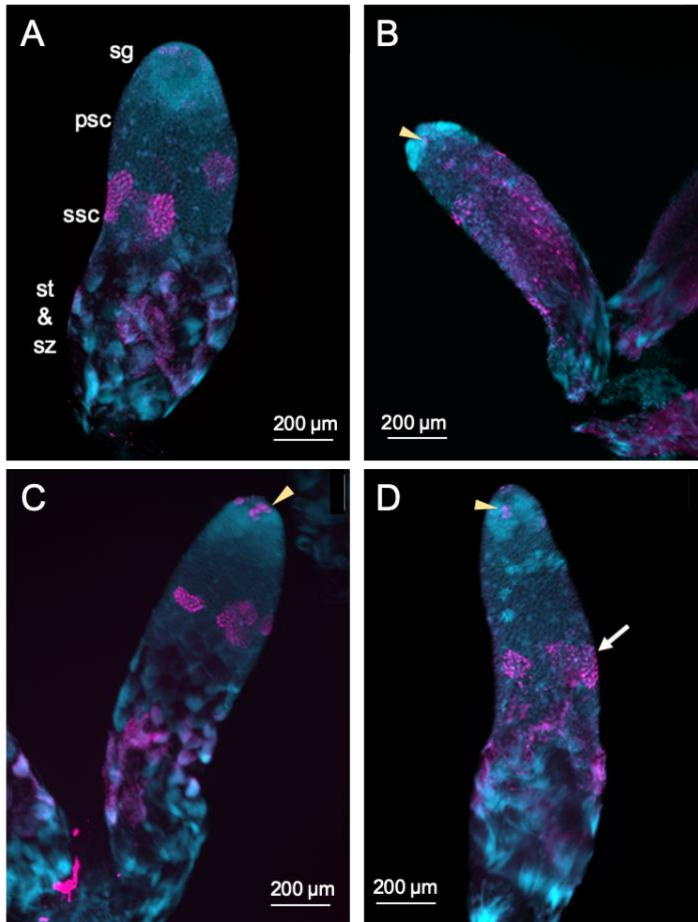

**Figure 4.** Timing of treatment during development determined the effect on testis structure of adults that develop from *Dnmt1* (Panels C and D) knockdown males. In control testis tubules (A and B), spermatogenesis progresses from the tip of the testis tubule. The germline stem cell and spermatogonia (sg) are located at the anterior end of the tubule. Spermatogonia divide mitotically to form spermatocysts containing 64 spermatogonia (Economopoulos & Gordon 1971, Ewen-Campen et al. 2013). Mitotic spermatogonia are labeled with anti-phosphohistone 3 antibodies in this region of the testis tubule (C arrowhead). *Oncopeltus fasciatus* undergoes inverted meiosis (Viera et al. 2009), primary spermatocytes (psc) undergo the first meiotic division to produce diploid secondary spermatocytes (ssc). The meiotic division of the ssc produce the haploid spermatids (st) and spermatozoa (sz). In our control samples, a band of synchronously dividing spermatocysts, identified by positive anti-phosphohistone H3 antibody staining, was present at the interface between primary and secondary spermatocytes (A, C). In testes from males with *Dnmt1* knockdown in the 3<sup>rd</sup> instar (B), the anterior tip of the testis tubule looked relatively normal and there was evidence of mitotic activity (arrowhead). However, there were fewer spermatocytes present and the spermatocysts in this region were disorganized and there was little evidence of the band of positive anti-phosphohistone H3 stained meiotic spermatocytes. The testis tubule structure from males treated with *ds-Dnmt1* following meiosis at the 5<sup>th</sup> instar stage of development (D) was more similar to the controls than those treated at the 3<sup>rd</sup> instar stage of development. In *ds-Dnmt1* males treated at the 5<sup>th</sup> instar stage, there were positive anti-phosphohistone H3 stained spermatogonia (arrowhead) and spermatocytes (arrow). There were differences between control males and *ds-Dnmt1* treated males, however, including spermatocysts containing cells with highly condensed nuclei that were not present in the controls. All images taken at 10X magnification.

141 The structure of the testis tubules of males treated with  
142 *ds-Dnmt1* in the 3<sup>rd</sup> instar was highly disrupted and  
143 both the anterior and posterior testis tubule was  
144 affected (Figure 4B). There were fewer spermatocysts  
145 in both the region of spermatogonia and primary  
146 spermatocytes. While there were occasional  $\alpha$ -pHH3  
147 positive nuclei, these were not well organized into  
148 spermatocysts and were spread throughout the testis  
149 tubule rather than organized at the junction between  
150 primary and secondary spermatocytes. There was evidence of mitotic activity in the  
151 spermatogonia, although these were less frequent in *ds-Dnmt1* treated males than control males.

152 The testis tubules of males treated with ds-*Dnmt1* in the 5<sup>th</sup> instar stage of development had a  
153 structure much more similar to control males (Figure 4D). Mitotic activity was apparent in the  
154 spermatogonia and most testis tubules had evidence of mature sperm and  $\alpha$ -pHH3 stained  
155 spermatocysts at the junction between primary and secondary spermatocytes. Unorganized  
156 spermatocysts below this junction were frequently observed, however, and ds-*Dnmt1* males  
157 treated at the 5<sup>th</sup> instar had variable phenotypes posterior to the primary spermatocytes,  
158 presumably depending on when treatment occurred following the wave of meiosis along the  
159 testis tubule axis.

#### 160 ***Dnmt1* knockdown in adult males prevented replenishment of sperm stores**

161 Downregulating *Dnmt1* expression in adult males resulted in a loss of fecundity. The third and  
162 final females mated to ds-*Dnmt1* treated males ran out of sperm to fertilize eggs more rapidly  
163 than those mated to control males. Clutches of eggs laid by females mated to ds-*Dnmt1* treated  
164 males were not fertilized and failed to hatch at an earlier collection day than those laid by

165 females mated to control males (Figure 5;

166 Wilcoxon  $\chi^2 = 13.978$ , d. f. = 1,  $p < 0.001$ ).

167 The loss of fertility in males was associated with  
168 smaller testis size. Males treated with ds-*Dnmt1*  
169 at seven days post-emergence and then allowed to  
170 mate for three weeks prior to dissection had

171 statistically significantly smaller testis area than  
172 the testes of control males after the same mating  
173 treatment (ANOVA,  $F = 29.084$ , d.f. = 1, 51,  $p <$   
174  $0.001$ ; Supplementary materials, Figure S4). The

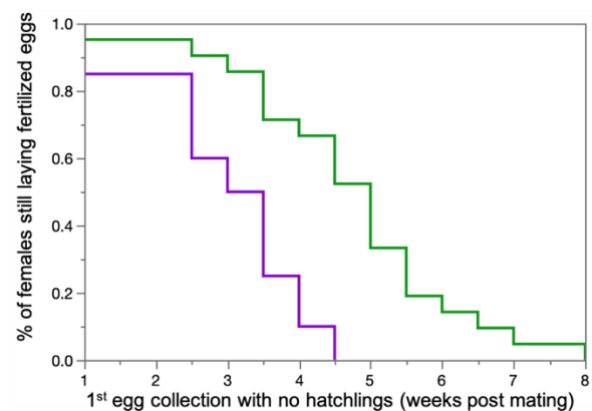

**Figure 5.** Females mated to control males lay fertilized eggs longer than females mated to *Dnmt1* knockdown males. Eggs were collected twice per week and eggs allowed to develop to hatching. Eggs that did not hatch showed no sign of development, indicating that they had not been fertilized. Both treatments demonstrate a decrease in proportion of eggs that hatch over time, but the ds-*Dnmt1* treatment group shows a faster decrease.

175 smaller testis area of ds-*Dnmt1* treated adult  
176 males was associated with a breakdown in  
177 testis tubule structure and the loss of sperm  
178 from the testis tubules (Figure 6). In control  
179 males, three weeks post injection the regions  
180 of spermatogenesis were recognizable. Small  
181 spermatocysts with spermatogonia  
182 undergoing mitotic divisions were  
183 observable at the anterior tip of the testis  
184 tubule (Figure 6A and B). Posterior to the  
185 spermatogonia were the primary  
186 spermatocytes with more diffuse nuclear  
187 structure. We often observed the band of  
188  $\alpha$ -pHH3 positive spermatocysts that  
189 indicated the first meiotic division to  
190 form the secondary spermatocytes. At the  
191 most posterior end of the testis tubule the  
192 spermatids developed into spermatozoa.  
193 Three weeks after *Dnmt1* knockdown  
194 testis tubule structure is significantly  
195 disrupted. There appeared to be fewer  
196 spermatogonia and those that remained  
197 had a more condensed nuclear structure

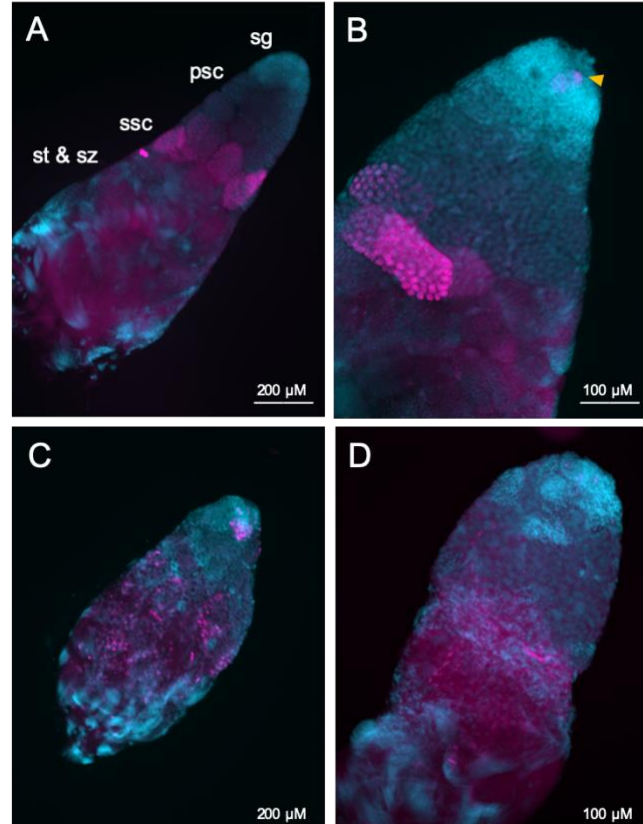

**Figure 6.** Testis structure breaks down in *Dnmt1* knockdown males treated as adults after having sperm replenishment induced by mating activity. The regions of spermatogenesis were apparent in mated males following 3 weeks of mating activity in control testis tubules (A and B) and the evidence of both mitotic division in spermatogonia (B, arrowhead) and the band of meiotic divisions was clear from anti-phosphohistone H3 staining. In *Dnmt1* knockdown males at low magnification (C), the anterior tip of the testis tubule looked relatively normal. However, the region containing both the primary and secondary spermatocytes was disorganized. Spermatocyst structure was broken down, and the nuclei of the primary and secondary spermatocytes had lost their characteristic structure (Ewen-Campen et al. 2013). Finally, there were fewer mature spermatids in the posterior end of the testis tubule. At higher magnification (D), it was apparent that nuclear structure in the anterior tip was also affected by the knockdown, both in the spermatogonia and spermatocytes. Spermatogonia nuclei in the *Dnmt1* knockdown testis tubules (D) were more condensed than in the control testis tubules (B), although they still seemed to be organized into spermatocysts. Spermatocyte nuclei, however, were fewer in number than in controls, did not have their characteristic shape (Ewen-Campen et al. 2013, Economopoulos & Gordon 1971), and were not organized in spermatocytes. A and C: 10X magnification, B and D: 20X magnification.

198 than in the testis tubules of control males (Figure 6C and D). The most noticeable effect was seen  
199 in the region containing the spermatocytes. There were few primary spermatocytes in the testis  
200 tubule and  $\alpha$ -pHH3 positively stained spermatocysts were rarely observed, indicating few  
201 spermatocysts undergoing meiosis.

## 202 **Discussion**

203 The function of DNA methylation and the DNA methylation enzymes across the insect tree of  
204 life has been widely debated, particularly in light of the extreme variation in presence of this  
205 chromatin modification and the diversification of the enzymatic toolkit required to methylate  
206 DNA *de novo* and maintain DNA methylation patterns (Bewick et al. 2016, Lyko 2018, Lewis et  
207 al. 2020). This evolutionary pattern is particularly intriguing given that in a number of insect  
208 groups the maintenance methyltransferase DNMT1 is essential to gametogenesis, and thus is  
209 tightly tied to fitness, even in species where DNA methylation itself is absent. Here we showed  
210 that *Dnmt1* expression affects meiosis without any obvious phenotypic effects in somatic tissue.  
211 The effect of downregulating *Dnmt1* in males, as in females (Amukamara et al. 2020), was  
212 specific to the germ cells. Nymphs treated as early as the 3<sup>rd</sup> instar stage develop normally and  
213 are indistinguishable from control adults. The downregulation of *Dnmt1* did result in reduction of  
214 DNA methylation but there were no morphological impacts to the RNAi-treated individuals. Our  
215 results show that the function of *Dnmt1* in germ cells is conserved across the sexes within a  
216 species, and other results document that *Dnmt1* expression is required for oogenesis among  
217 species. This raises a conundrum when we look across the insect tree of life. How can a gene  
218 required for such a fundamental fitness activity in examples from such a diverse group of insects  
219 also be so evolutionarily labile? This suggests that the function *Dnmt1* in germ cell development  
220 is easily lost or replaced.

221 ***Dnmt1* knockdown causes inhibition of spermatogenesis consistent with a role in meiosis**

222 If our hypothesis on the role of *Dnmt1* in meiosis is correct, then spermatogenesis should be  
223 affected by *Dnmt1* expression as well as oogenesis. In the testes *O. fasciatus* males, we observed  
224 both spermatogonia and primary spermatocytes that stain positively for phosphorylation of the  
225 serine 10 residue of histone protein H3. While the pattern of histone H3 phosphorylation across  
226 meiosis has not been specifically studied in *O. fasciatus*, phosphorylation of the serine 10 is  
227 typically associated with chromosome condensation during meiosis (Hans and Dimitrov 2001)  
228 and mitosis (Prigent and Dimitrov 2003). Moreover, the pattern of  $\alpha$ -pHH3 staining along the  
229 axis of the testis tubule is consistent with this histone modification occurring in both mitosis and  
230 meiosis. We observed  $\alpha$ -pHH3 positive cells both within spermatocysts containing the  
231 mitotically dividing spermatogonia and also at the boundary between primary and secondary  
232 spermatocytes. We have confirmed this landmark using *Boule* knockdown males. In *Drosophila*,  
233 *Boule* is required for progression of spermatocytes through meiosis. Germ cells lacking  
234 functional *Boule* become arrested at meiotic prophase (Eberhart et al. 1996). In the testes of *O.*  
235 *fasciatus* males treated with ds-*Boule*, the affected cells were all posterior to the band of  
236 synchronous  $\alpha$ -pHH3 positive spermatocytes. Thus,  $\alpha$ -pHH3 staining provided a landmark for  
237 entry into meiosis.

238 We did not see the band of  $\alpha$ -pHH3 positive spermatocysts at the border between primary and  
239 secondary spermatocytes in the *Dnmt1* knockdown males treated at the 3<sup>rd</sup> instar stage of  
240 development. This could be interpreted as the primary spermatocytes have not initiated  
241 chromosome condensation. However, we did observe individual  $\alpha$ -pHH3 positive nuclei in the  
242 posterior testis tubule. So there could have been arrest after chromatin condensation with a  
243 breakdown in spermatocyst structure. Interestingly, the testis phenotype of our *Dnmt1*

244 knockdown males resembled the phenotypic effect of *Vasa* knockdown reported by Ewen  
245 Campen et al. 2013. *Vasa* RNAi results in defects in cyst integrity and Ewen Campen et al.  
246 (2013) propose that *Vasa* plays a specific role in the onset or synchrony of meiosis. *Vasa* has also  
247 been proposed to be required for the correct progression through meiosis in mice (Tanaka et al.  
248 2000) and humans (Medrano et al. 2012). Thus, the phenotypic similarity between *Dnmt1*  
249 knockdown and *Vasa* knockdown testes in *O. fasciatus* support the hypothesis that *Dnmt1* may be  
250 required for the successful initiation and completion of meiosis in spermatocytes. More work  
251 remains to determine exactly what stage of sperm development is impacted by the decrease in  
252 *Dnmt1* expression.

253 The phenotype of knockdown of *Dnmt1* is exacerbated when knockdown occurs prior to the  
254 stage of testis development when meiosis occurs, as was observed in female *O. fasciatus*  
255 (Amukamara et al. 2020). One interpretation of this result is that *Dnmt1* is required for  
256 successful progression through meiosis. However, it is clear that reducing *Dnmt1* expression had  
257 an impact beyond simply reducing the ability to enter or complete meiosis. A block to  
258 progression through meiosis, as demonstrated by the *Boule* knockdown, spermatogonia and  
259 primary spermatocytes would continue to be born but remain viable after a failure to complete  
260 meiosis. In the *Dnmt1* knockdowns, however, there were fewer germ cells of any type, and those  
261 that remained in the testis tubule often appeared to have abnormal and condensed nuclei. It  
262 remains to be determined if *Dnmt1* is required for meiosis or if the association with meiosis is a  
263 correlation; *Dnmt1* could be required for viability of germ cells and act at the stage of  
264 development at which they would be undergoing meiosis.

265 Previous studies on the function of *Dnmt1* in insect spermatogenesis have not documented any  
266 effect on male fertility. Knockdown of *Dnmt1* in the red flour beetle, *T. castaneum* (Schulz et al.

267 2018) had no effect on the fecundity of female mating partners was measured in the first nine  
268 days post mating and the authors conclude that *Dnmt1* is not required for spermatogenesis in *T.*  
269 *castaneum*. However, we do not think that the function of *Dnmt1* in spermatogenesis is unique to  
270 *O. fasciatus*. In the *T. castaneum* study, the authors did not examine testis structure or design a  
271 mating strategy that would exhaust the sperm stores of the males and so may have missed a  
272 fertility effect. In holometabolous insects, including beetles, spermatocytes are typically formed  
273 by the end of larval development (Economopoulos & Gordon 1971), thus males treated as pupae  
274 would still emerge with large numbers of sperm in their testes. Here we showed that male *O.*  
275 *fasciatus* treated with ds-*Dnmt1* RNA as sexually mature adults become sperm limited more  
276 rapidly than control males. There is a potential alternative explanation, that *Dnmt1* knockdown  
277 males could continue to produce sperm but that sperm was of low quality and unable to support  
278 development. Given that the testes of ds-*Dnmt1* treated males were significantly smaller than  
279 control males and had altered testis tubule structure, which indicated that spermatogenesis was  
280 significantly impacted, we concluded that *Dnmt1* knockdown males are unable to replenish  
281 sperm supplies.

## 282 **DNA methylation and germ cell development**

283 The knockdown of *Dnmt1* resulted in a reduction of DNA methylation within the testes, as  
284 predicted. The effect was greater in the nymphs that were treated in an earlier stage of  
285 development, as would be expected given the greater number of cell divisions that would occur  
286 between treatment and collection of the testes between the 3<sup>rd</sup> and 5<sup>th</sup> instar treatments. The more  
287 extreme phenotype in the 3<sup>rd</sup> instar treated males could be explained by the greater reduction in  
288 methylated CpG. However, the percent methylation seen in the testes of the 5<sup>th</sup> instar ds-*Dnmt1*  
289 treated males was similar to that seen in females treated at the 4<sup>th</sup> instar stage of development

290 (Amukamara et al. 2020), greater than a two-fold reduction in the percent methylated CpG  
291 residues. In *Dnmt1* knockdown females, there was a complete loss of oocyte production when  
292 DNA methylation was reduced to this level while in males the phenotype of the 5<sup>th</sup> instar *Dnmt1*  
293 knockdowns was close to normal. This disconnect between reduction of DNA methylation and  
294 phenotypic effects mirrors what has been seen in the beetle, *T. castaneum* (Schulz et al. 2018). In  
295 this species, the reduction of DNA methylation is an evolved difference rather than an  
296 experimental effect, but the results are similar to what we have observed in *O. fasciatus*; DNA  
297 methylation is not required for function of somatic cells, but downregulation of *Dnmt1*  
298 expression leads to specific germ cell effects. The lack of correlation between extent of  
299 methylation and function in germ cells strengthens our hypothesis that there may be a pleiotropic  
300 function for *Dnmt1* in germ cells that acts independently of DNA methylation levels. Also  
301 consistent with this idea is the finding that *Dnmt1* expression is elevated in both the ovaries and  
302 testes relative to somatic tissue in the migratory locust, *Locusta migratoria* (Robinson et al.  
303 2016). Alternatively, DNA methylation may have a specific role in the germ cells that it does not  
304 play in somatic cells. Perhaps DNA methylation is required for proper gene expression in germ  
305 cells or it may be required for transposon silencing only in germ cells. Another possibility is that  
306 DNA methylation state may be a prerequisite for successful completion of meiosis and not  
307 mitosis. For example, *O. fasciatus* has holocentric chromosomes and undergoes inverted meiosis  
308 (Viera et al. 2009). During mitosis chromosomes have a kinetochore that extends across the  
309 majority of the chromosome but in meiosis, the kinetochore plate is missing and microtubules  
310 extend into the chromosome (Comings & Okada 1972). One could imagine that DNA  
311 methylation might be required for this interaction. However, the complete lack of methylation  
312 but a functional role of *Dnmt1* in *T. castaneum* oogenesis alongside our results argues for a



313 pleiotropic function for *Dnmt1* in gametogenesis that is independent of its role in DNA  
314 methylation.

## 315 **Conclusion**

316 *Dnmt1* expression is required for germ cell development in both male and female *O. fasciatus*.  
317 The block to germ cell development in *Dnmt1* knockdowns appeared to be associated with  
318 meiosis, although it was not a simple block to progression through meiosis as germ cells are lost  
319 from the testes. Thus, *Dnmt1* may be required for germ cell viability. It still remains to be  
320 determined if the block in gametogenesis depends on DNA methylation or an alternative  
321 function of *Dnmt1*, as suggested by the requirement for *Dnmt1* during gametogenesis in an insect  
322 with a non-methylated genome (Schultz et al. 2018). Whatever the specific function of *Dnmt1* in  
323 gametogenesis, the requirement for this enzyme in such a critical fitness function as the  
324 production of gametes in representatives of different groups of insects raises important questions  
325 as to how this enzyme and the entire methylation toolkit has evolved across the insect tree of life.  
326 Functional analysis of *Dnmt1* in the insect groups where it is found, and study of how these  
327 functions are replaced in the species where it is no longer found, will be essential for  
328 understanding the evolution of this important base modification.

## 329 **Materials and Methods**

### 330 **Animal care**

331 All experimental animals were from colonies of laboratory reared *O. fasciatus* (Carolina  
332 Biologicals, Burlington, NC) and were reared under standard rearing conditions of 12 hr:12 hr  
333 light/dark at 27° C. To collect animals of known age and social conditions, eggs were removed  
334 from the mass colonies and allowed to hatch in plastic storage containers containing *ad libitum*

335 deionized water and organic, raw sunflower seeds. For the nymph injections, nymphs were  
336 pulled from mixed sex nymph colonies at the 3<sup>rd</sup> instar or 5<sup>th</sup> instar. For adult injections, nymphs  
337 were separated by sex at the 4<sup>th</sup> instar and housed in single sex colonies. These were checked  
338 daily and newly emerged adults. All experimental animals were placed into individual petri  
339 dishes with food and water.

#### 340 **Developmental expression**

341 Given our hypothesis that *Dnmt1* is required for development of germ cells and meiosis we  
342 examined the expression levels of *Dnmt1* across development in males. Groups of nymphs were  
343 staged and flash frozen in liquid nitrogen and stored at -80° C. Males were able to be  
344 distinguished from females reliably in the 4<sup>th</sup> and 5<sup>th</sup> instar stages, so at these stages the nymphs  
345 were separated by sex. We also collected virgin males on the day of adult emergence and after  
346 sexual maturation at 7 days post-adult-emergence. We collected and tested these samples at the  
347 same time as the data reported for females (Amukamara et al. 2020). Because 2<sup>nd</sup> and 3<sup>rd</sup> instar  
348 nymphs cannot be reliably sexed, the data presented here is the same as that presented in the  
349 previous publication. Further, we used the female data to examine sex differences in expression.  
350 The female data has been deposited in the DRYAD Digital Repository  
351 (<https://doi.org/10.5061/dryad.kwh70rz0m>).

352 Total RNA was extracted using a Qiagen RNA easy kit with Qiazol (Qiagen, Venlo, The  
353 Netherlands) and complementary DNA (cDNA) synthesized from 500 ng RNA with aScript  
354 cDNA Super-Mix (Quanta Biosciences, Gaithersburg, MD). Quantitative real-time PCR (qRT-  
355 PCR) was used to determine expression levels of *Dnmt1* and two genes with known functions in  
356 spermatogenesis, *Boule* and *Vasa*. Primers are described in Amukamara et al. 2020. As in  
357 Amukamara et al. 2020, actin and GAPDH were used as reference genes. We have previously

358 validated these reference genes and they are accepted as robust reference genes in *O. fasciatus*  
359 (Meinzer et al. 2019). We used a Roche LightCycler 480 with the SYBR Green Master Mix  
360 (Roche Applied Science Indianapolis, IN). All samples were run with 3 technical replicates using  
361 10  $\mu$ L reactions. Primer efficiency calculations, genomic contamination testing, and endogenous  
362 control gene selection were performed as described in Cunningham et al. 2014. We used the  
363  $\Delta\Delta$ CT method to compare levels of gene expression across the samples (Livak and Schmittgen  
364 2001). Gene expression was standardized per individual to account for different numbers of  
365 individuals within each group at each developmental stage. Differences in expression levels were  
366 analyzed using ANOVA in JMP Pro v14. If there was a significant overall effect, we compared  
367 means using Tukey-Kramer HSD.

#### 368 **RNAi preparation**

369 Double-stranded RNAs were prepared as described in Amukamara et al. 2020. Briefly, DNA  
370 templates were prepared by PCR using gene-specific primers (Amukamara et al. 2020). Sense  
371 and anti-sense RNA were transcribed together with an Ambion MEGAscript kit (ThermoFisher  
372 Sci, Waltham, MA) and allowed to anneal to form a 404 bp ds-*Dnmt1* RNA. The concentration  
373 of dsRNA was adjusted to 3  $\mu$ g/ $\mu$ L in injection buffer (5 mM KCl, 0.1 mM NaH<sub>2</sub>PO<sub>4</sub>).

#### 374 **Nymph injections, testis size and morphology**

375 To examine the effect of *Dnmt1* knockdown prior to or following the wave of meiosis initiated in  
376 the 4<sup>th</sup> instar stage, nymphs were injected with ds-*Dnmt1* or control injections at either the 3<sup>rd</sup>  
377 instar or 5<sup>th</sup> instar stage of development. Previous studies from our lab have shown no difference  
378 in buffer alone controls or non-specific ds-RNA (Bewick et al. 2019). For further information on  
379 controls and testing for potential off-target effects please see Amukamara et al. 2020. Nymphs

380 were anaesthetized at 4° C for 20 minutes prior to injection. Nymphs were injected in the  
381 abdomen using pulled glass capillary needles (Sutter Instrument Company micropipette puller  
382 model P-97, Novato, CA) between the third and fourth abdominal segments (Chesebro et al.  
383 2009). Nymphs were injected with 2 µL volume for all injections. Following injections, nymphs  
384 were placed in individual petri dishes and monitored for development. Date of adult emergence  
385 was recorded.

386 *Testis size:* At 7 to 10 days post-adult emergence, virgin males were dissected and their testes  
387 were removed. Whole testes were allowed to settle into 1 mL Phosphate Buffered Saline (PBS)  
388 and were imaged with a Leica M60 Stereomicroscope with Leica Application Suite software  
389 (LAS v4). Testis area was measured on one of the pair from each male with the LAS by  
390 outlining the whole testis with all 7 testis tubules.

391 *Testis tubule structure:* *O. fasciatus* testes contain 7 individual testis tubules surrounded by a  
392 relatively impermeable, autofluorescent membrane. Individual testis tubules were removed from  
393 the outer membranous sheath for fixation and staining. Tubules were fixed for 30 minutes in 4%  
394 formaldehyde in PBS plus 0.1% Triton-X100 (PBT) and stained for evidence of cell division  
395 using an  $\alpha$ -phosphohistone H3 Ser10 (pHH3) primary antibody (Millipore antibody 06-570,  
396 Sigma-Aldrich, St. Louis, MO).  $\alpha$ -phosphohistone H3 (pHH3) stains for chromosome  
397 condensation in preparation for mitosis and meiosis (Hans & Dimitrov 2001, Prigent & Dimitrov  
398 2003). The secondary antibody was an Alexa Fluor goat-anti-rabbit 647 (ThermoFisher  
399 Scientific, Waltham, MA). Following antibody staining the tubules were stained with DAPI (0.5  
400 µg/mL PBT) to visualize nucleic acids. Stained tubules were mounted in Mowiol 4-88 mounting  
401 medium (Sigma-Aldrich, St. Louis, MO) and visualized with an Olympus BX51 Fluorescent  
402 microscope.

### 403 **Quantitative Real Time PCR**

404 While we had evidence that all our RNAi treatments successfully knocked down expression in  
405 females (Amukamara et al. 2020), to confirm that our RNAi treatment was effective in males,  
406 total RNA and genomic DNA was extracted from flash frozen testes of 7- to 10-day old males  
407 from each treatment at both developmental stages (3<sup>rd</sup> and 5<sup>th</sup> instar) using a Qiagen Allprep  
408 DNA/RNA Mini Kit (Qiagen, Venlo, The Netherlands). Expression levels for *Dnmt1* was  
409 analyzed using qRT-PCR as described above.

### 410 **Quantification of DNA methylation**

411 The DNA from each prep used for qRT-PCR was used to prepare MethylC-seq libraries as  
412 described in Urich et al. 2015 and Amukamara et al. 2020. Samples were sequenced on a  
413 NextSeq500 and qualified reads were aligned to the *O. fasciatus* genome assembly according to  
414 previously published methods (Schmitz et al. 2013). The percent DNA methylation was  
415 calculated by dividing the total number of methylated CpG sites by the total number of CpG sites  
416 (Schultz et al. 2012). Spiked in Lambda DNA, which is fully demethylated, was used as a control  
417 for the sodium bisulfite conversion rate of unmodified cytosines.

### 418 **Adult injections**

419 *RNAi treatment*: Sexually mature virgin males (7 days post-adult-emergence) were injected with  
420 3  $\mu$ L ds-*Dnmt1* RNA or buffer control injections using a pulled glass capillary needle between  
421 the third and fourth abdominal segments (Chesebro et al. 2009). Following injection males were  
422 placed into individual petri dishes and provided with *ad libitum* food and water. A total of 30  
423 *Dnmt1* knockdown males and 30 control males were treated.

424 *Male fecundity*: Preliminary experiments had shown that two previous matings were required to  
425 deplete sperm stores. Therefore, in order to allow males to deplete sperm stores acquired during  
426 nymphal development and sexual maturation, males were placed in mating trials with three 7- to  
427 10-day-old virgin females, one provided each week. The first female was placed in the male's  
428 petri on the day of injection with cotton wool as an oviposition substrate. The female and all eggs  
429 were removed at the end of the week (7 days post-injection) and discarded and replaced with a  
430 second 7- to 10-day-old virgin female and fresh cotton wool. Again, at the end of the week (14  
431 days post-injection), the female and all resulting eggs were discarded. A third, focal, 7- to 10-  
432 day-old virgin female was placed with the male with fresh cotton wool. The 3<sup>rd</sup> female and  
433 experimental male were given one week to mate before the male was removed from the petri  
434 dish for analysis of testis size and structure. The female was maintained for her lifetime,  
435 provided with *ad libitum* food and water. The eggs produced by the 3<sup>rd</sup> female were collected  
436 from the petri dish twice a week at 3-4 day intervals and the oviposition substrate replaced with  
437 fresh cotton wool. The eggs collected were placed in a separate container and allowed to develop  
438 to hatching (approximately 7-10 days following collection) and then frozen at -20° C until  
439 assayed. We recorded the first collection date for which no eggs hatched. We analyzed the time  
440 to end of fertilized eggs due to sperm depletion relative to treatment using a survival analysis  
441 (Wilcoxon Rank Sum test) using JMP Pro v14.1.

442 *Testis size*: At the end of the one-week mating trial with the 3<sup>rd</sup> female (21 days post-injection),  
443 males were dissected and their testes removed into 1 mL Phosphate Buffered Saline (PBS).  
444 Whole testes were photographed and measured as described above.

445 *Testis tubule structure*: Testis tubules from mated males were isolated, fixed and stained as  
446 described above.

447 **Author Contributions**

448 PJM and RJS contributed conception and design of the study. JW, KC, AUA, LG, ECM, and  
449 PJM collected the data. All authors contributed to the analysis of the data. JW and PJM wrote the  
450 first draft of the manuscript, with contributions from KC. All authors contributed to manuscript  
451 revision and all authors read and approved the submitted version.

452 **Acknowledgments**

453 The authors acknowledge Allen J. Moore and other members of the Moore lab for many helpful  
454 discussions. We acknowledge Luvika Gupta, who's undergraduate research provided preliminary  
455 data used in our experimental design. We also would like to acknowledge Tyler Earp for  
456 preparing and analyzing low throughput whole genome bisulfite sequencing data.

457 **Competing Interests**

458 The authors have no competing interests in regards to this work.

459

460 **References**

- 461 Amukamara A.U., J. T. Washington, Z. Sanchez, E.C. McKinney, A. J. Moore, R. J.  
462 Schmitz, P. J. Moore. More than DNA methylation: does pleiotropy drive the complex  
463 pattern of evolution of Dnmt1? *Frontiers in Ecology and Evolution* 8, 4 (2020).
- 464 Bewick, A.J., K. J. Vogel, A. J. Moore, R. J. Schmitz. Evolution of DNA methylation across  
465 insects. *Molecular Biology and Evolution* 34, 654-66 (2016).
- 466 Bewick, A.J., Z. Sanchez, E. C. Mckinney, A. J. Moore, P. J. Moore, R. J. Schmitz. *Dnmt1* is  
467 essential for egg production and embryo viability in the large milkweed bug,  
468 *Oncopeltus fasciatus*. *Epigenetics & Chromatin* 12, 6 (2019).
- 469 Chesebro, J., S. Hrycaj, N. Mahfooz, A. Popadić. Diverging functions of Scr between  
470 embryonic and post-embryonic development in a hemimetabolous insect, *Oncopeltus*  
471 *fasciatus*. *Developmental Biology* 329, 142-151 (2009).
- 472 Comings, D.E., T. A. Okada. Holocentric chromosomes in *Oncopeltus*: kinetochore plates  
473 are present in mitosis but absent in meiosis. *Chromosoma* 37, 177-192 (1972).  
474 <https://doi.org/10.1007/BF00284937>
- 475 Cunningham, C.B., L. Ji, R. A. W. Wiberg, J. Shelton, E. C. McKinney, D. J. Parker, R. B.  
476 Meagher, K. M. Benowitz, E. M. Roy-Zokan, M. G. Ritchie, S. J. Brown, R. J.  
477 Schmitz, A. J. Moore. The genome and methylome of a beetle with complex social  
478 behavior, *Nicrophorus vespilloides* (Coleoptera: Silphidae). *Genome Biology and*  
479 *Evolution* 7, 3383-3396 (2015).
- 480 Eberhart, C.G., J. Z. Maines, S. A. Wasserman. Meiotic cell cycle requirement for a fly  
481 homologue of human Deleted in Azoospermia. *Nature* 381, 783-785 (1996).
- 482 Economopoulos, A.P. H. T. Gordon. Growth and differentiation of the testes in the large  
483 milkweed bug, *Oncopeltus fasciatus* (Dallas). *Journal of Experimental Zoology* 177,  
484 391-405 (1971).
- 485 Ewen-Campen, B., T. E. Jones, C. G. Extavour. Evidence against a germ plasm in the  
486 milkweed bug *Oncopeltus fasciatus*, a hemimetabolous insect. *Biology Open* 2, 556-  
487 568 (2013).
- 488 Gegner, J., T. Gegner, H. Vogel, A. Vilcinskis. Silencing of the DNA methyltransferase 1  
489 associated protein 1 (DMAP1) gene in the invasive ladybird *Harmonia axyridis* implies  
490 a role of the DNA methyltransferase 1-DMAP1 complex in female fecundity. *Insect*  
491 *Molecular Biology* 29, 148-159 (2020). <https://doi.org/10.1111/imb.12616>
- 492 Glastad, K.M., B. G. Hunt, M. A. Goodisman. Epigenetics in insects: genome regulation and  
493 the generation of phenotypic diversity. *Annual Review of Entomology* 64, 185-203  
494 (2019). [doi.org/10.1146/annurev-ento-011118-111914](https://doi.org/10.1146/annurev-ento-011118-111914)
- 495 Hans, F., S. Dimitrov. Histone H3 phosphorylation and cell division. *Oncogene* 20, 3021-  
496 3027 (2001).
- 497 Lewis S.H., L. Ross, S. A. Bain, E. Pahita, S. A. Smith, R. Cordaux, et al. Widespread  
498 conservation and lineage-specific diversification of genome-wide DNA methylation  
499 patterns across arthropods. *PLoS Genetics* 16, e1008864 (2020).  
500 <https://doi.org/10.1371/journal.pgen.1008864>



- 501 Livak, K.J., T. D. Schmittgen. Analysis of relative gene expression data using real-time  
502 quantitative PCR and the 2<sup>-</sup> ΔΔCT method. *Methods* 25, 402-408 (2001).
- 503 Lyko, F. The DNA methyltransferase family: a versatile toolkit for epigenetic regulation.  
504 *Nature Reviews Genetics* 19, 81-92 (2018).
- 505 Medrano, J.V., C. Ramathal, H. N. Nguyen, C. Simon, R. A. Reijo Pera. Divergent RNA-  
506 binding proteins, DAZL and VASA, induce meiotic progression in human germ cells  
507 derived in vitro. *Stem cells* 30, 441-451 (2012).
- 508 Meinzer, F., S. Dobler, A. Donath, J. N. Lohr. Robust reference gene design and validation  
509 for expression studies in the large milkweed bug, *Oncopeltus fasciatus*, upon cardiac  
510 glycoside stress. *Gene* 710, 66-75 (2019).
- 511 Prigent, C. S. Dimitrov. Phosphorylation of serine 10 in histone H3, what for?. *Journal of*  
512 *Cell Science* 116, 3677-3685 (2003).
- 513 Robinson, K.L., D. Tohidi-Esfahani, F. Ponton, S. J. Simpson, G. A. Sword, N. Lo.  
514 Alternative migratory locust phenotypes are associated with differences in the  
515 expression of genes encoding the methylation machinery. *Insect Molecular Biology* 25,  
516 105-115 (2016).
- 517 Schmidt, E. D., E. Sehn, A. Dorn. Differentiation and ultrastructure of the spermatogonial  
518 cyst cells in the milkweed bug, *Oncopeltus fasciatus*. *Invertebrate Reproduction &*  
519 *Development* 42, 163-178 (2002). DOI:10.1080/07924259.2002.9652773
- 520 Schmitz, R. J., Z. A. Lewis, M. G. Goll. DNA methylation: shared and divergent features  
521 across eukaryotes. *Trends in Genetics* 35, 818-827 (2019).  
522 [doi.org/10.1016/j.tig.2019.07.007](https://doi.org/10.1016/j.tig.2019.07.007)
- 523 Schmitz, R.J., Y. He, O. Valdés-López, S. M. Khan, T. Joshi, M. A. Urich, J. R. Nery, B.  
524 Diers, D. Xu, G. Stacey, J. R. Ecker. Epigenome-wide inheritance of cytosine  
525 methylation variants in a recombinant inbred population. *Genome Research* 23, 1663-  
526 1674 (2013).
- 527 Schultz, M.D., R. J. Schmitz, J. R. Ecker. ‘Leveling’ the playing field for analyses of single-  
528 base resolution DNA methylomes. *Trends in Genetics* 28, 583-585 (2012).  
529 DOI:<https://doi.org/10.1016/j.tig.2012.10.012>
- 530 Schulz, N.K., C. I. Wagner, J. Ebeling, G. Raddatz, M. F. Diddens-de Buhr, F. Lyko, J.  
531 Kurtz. Dnmt1 has an essential function despite the absence of CpG DNA methylation  
532 in the red flour beetle *Tribolium castaneum*. *Scientific Reports* 8, 1-10 (2018).  
533 <https://doi.org/10.1038/s41598-018-34701-3>
- 534 Shah, C., M. J. VanGompel, V. Naeem, Y. Chen, T. Lee, N. Angeloni, Y. Wang, Y. E. Y.  
535 Xu. Widespread presence of human BOULE homologs among animals and  
536 conservation of their ancient reproductive function. *PLoS Genetics* 6, e1001022 (2010).  
537 [doi.org/10.1371/journal.pgen.1001022](https://doi.org/10.1371/journal.pgen.1001022)
- 538 Tanaka, S.S., Y. Toyooka, R. Akasu, Y. Katoh-Fukui, Y. Nakahara, R. Suzuki, M.  
539 Yokoyama, T. Noce. The mouse homolog of Drosophila Vasa is required for the  
540 development of male germ cells. *Genes & Development* 14, 841-853 (2000).

- 541 Ulrich, M. S., J. R. Nery, R. Lister, R. J. Schmitz, J. R. Ecker. MethylC-seq library  
542 preparation for base-resolution whole-genome bisulfite sequencing. *Nature Protocols*  
543 10, 475–483 (2015). doi: 10.1038/nprot.2014.114
- 544 Viera, A., J. Page, J. Rufas. Inverted meiosis: the true bugs as a model to study. In:  
545 Benavente, R., Volf J.-N. (eds): *Meiosis*. Genome Dynamics, Basel, Karger, 2009, vol  
546 5, pp 137-156 (2009). <https://doi.org/10.1159/000166639>
- 547 Yajima, M., G. M. Wessel. The multiple hats of Vasa: its functions in the germline and in  
548 cell cycle progression. *Molecular reproduction and development* 78, 861-867 (2011)
- 549 Zemach, A., I. E. McDaniel, P. Silva, D. Zilberman. Genome-wide evolutionary analysis of  
550 eukaryotic DNA methylation. *Science* 328, 916-919 (2010).
